# Supplementary material for: Sall1 in renal stromal progenitors non-cell autonomously restricts the excessive expansion of nephron progenitors
Source: PubMed Central journal article supplement (PMC4625151; doi:10.1038/srep15676), 2015-10-29

## **Supplemental information**

***Sall1* in renal stromal progenitors non-cell autonomously restricts the excessive expansion of nephron progenitors**

**Tomoko Ohmori, Shunsuke Tanigawa, Yusuke Kaku, Sayoko Fujimura, and  
Ryuichi Nishinakamura\***

**Department of Kidney Development and Liaison Laboratory Promotion Facility,  
Institute of Molecular Embryology and Genetics, Kumamoto University,  
Kumamoto 860-0811, Japan**

**\* E-mail: [ryuichi@kumamoto-u.ac.jp](mailto:ryuichi@kumamoto-u.ac.jp)**

**Supplementary Figure S1 | Sall1 expression in the stroma is absent in the *Foxd1GFPCre; Sall1<sup>lox/lox</sup>* mice.**

Immunostaining for Sall1, Six2, and GFP of *Sall1<sup>lox/lox</sup>*, *Foxd1GFPCre; Sall1<sup>lox/+</sup>*, and *Foxd1GFPCre; Sall1<sup>lox/lox</sup>* kidneys at E12.5 (A) and E14.5 (B). Serial sections of each genotype were stained. Sall1 in the stroma (asterisks) is absent, while GFP indicating *Foxd1* expression is retained in the homozygous mutant. Sall1 is not expressed in the medullary regions at E14.5. ub: ureteric bud. Scale bars = 100  $\mu$ m

**Supplementary Figure S2 | Survival, proliferation, and lineage commitment of the stromal progenitors are not affected in the *Sall1* mutants.**

(A) TUNEL and Aldh1a2 staining of *Sall1<sup>lox/lox</sup>* and *Foxd1Cre; Sall1<sup>lox/lox</sup>* kidneys at E14.5.

(B) The percentages of TUNEL-positive cells in the Aldh1a2-positive cortical stromal cells at E13.5 and E14.5.

(C) PHH3 and Aldh1a2 staining of *Sall1<sup>lox/lox</sup>* and *Foxd1Cre; Sall1<sup>lox/lox</sup>* kidneys at E14.5.

(D) The percentages of PHH3-positive cells in the Aldh1a2-positive cortical stromal cells at E13.5 and E14.5.

(E) tdTomato expression in *Foxd1Cre; R26R-tdTomato* and *Foxd1Cre; Sall1<sup>lox/lox</sup>; R26R-tdTomato* kidneys at E15.5, immunostained using an anti-RFP antibody. Arrows: glomeruli.

(F, G) Survival and proliferation of the neonatal nephron epithelia are not affected in the

*Sall1* mutants. The percentages of TUNEL-positive (F) or PHH3-positive (G) cells are shown for the E-cadherin-positive nephron epithelia in the cortex and medulla.

Scale bars: (A, C) = 20  $\mu\text{m}$ ; (E) = 100  $\mu\text{m}$ . Results are presented as the mean  $\pm$  standard error. NS: not significant statistically ( $p > 0.05$ ).

### Supplementary Figure S3 | Expression of stromal genes in the control and *Sall1* mutant kidneys.

(A-C) Whole mount *in situ* hybridisation of the embryonic kidney at E14.5. The expression levels of *Meis1* (A), *Hoxd10* (B), and *Tcf21* (C) are unaffected. *Meis1* and *Hoxd10* are also expressed in the neighbouring nephron progenitors, while *Tcf21* is expressed in the medullary stroma located deep inside the tissue. Therefore, the border of the expression domain is somewhat vague. Scale bars = 100  $\mu\text{m}$ .

### Supplementary Table | Primer sequences used for qPCR.

| Primers for quantitative RT-PCR |                             |
|---------------------------------|-----------------------------|
| Gene                            | Sequence (5' - 3')          |
| <i>Aldh1a2</i>                  | F AGCCCATTTGGAGTGTGTGGAC    |
|                                 | R TGCTCAGCGGGTTTGATGAC      |
| $\beta$ -Actin                  | F CATCCGTAAAGACCTCTATGCCAAC |
|                                 | R ATGGAGCCACCGATCCACA       |
| <i>Decorin</i>                  | F CTGGGCTGGCACAGCATAAGTA    |
|                                 | R GAACGCACATAGACACATCTGAAGG |
| <i>Fat4</i>                     | F GTGTTTAACGTCACCGATGCAGA   |
|                                 | R TCCA CTGCAA ACTGCCCAAG    |
| <i>Pdgfr</i> $\beta$            | F GAACGACCATGGCGATGAGA      |
|                                 | R GCATCGGATAAGCCTCGAACA     |
| <i>Six2</i>                     | F GCAACTTCCGCGAGCTCTAC      |
|                                 | R GCCTTGAGCCACA ACTGCTG     |

# Supplementary Figure S1

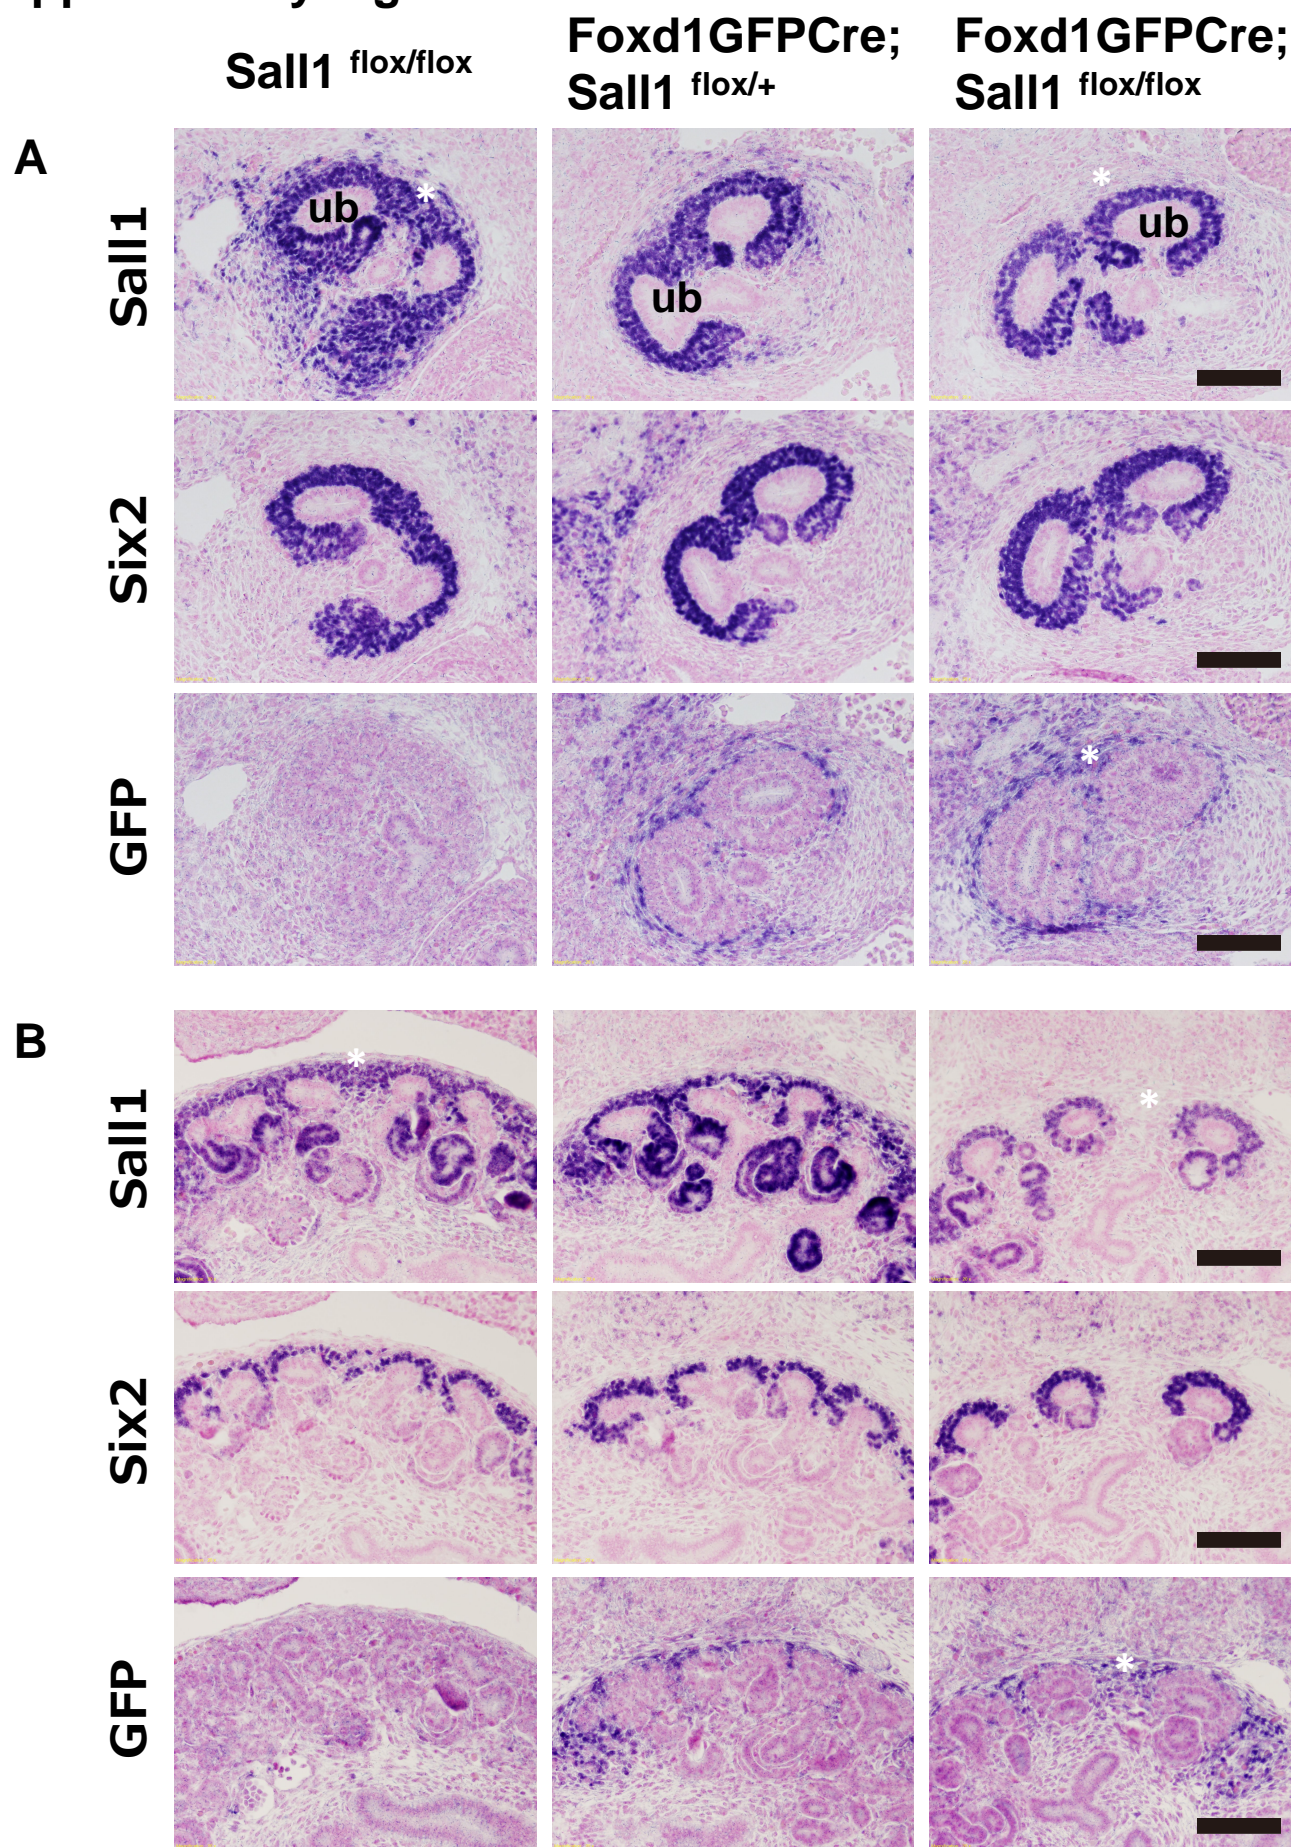

# Supplementary Figure S2

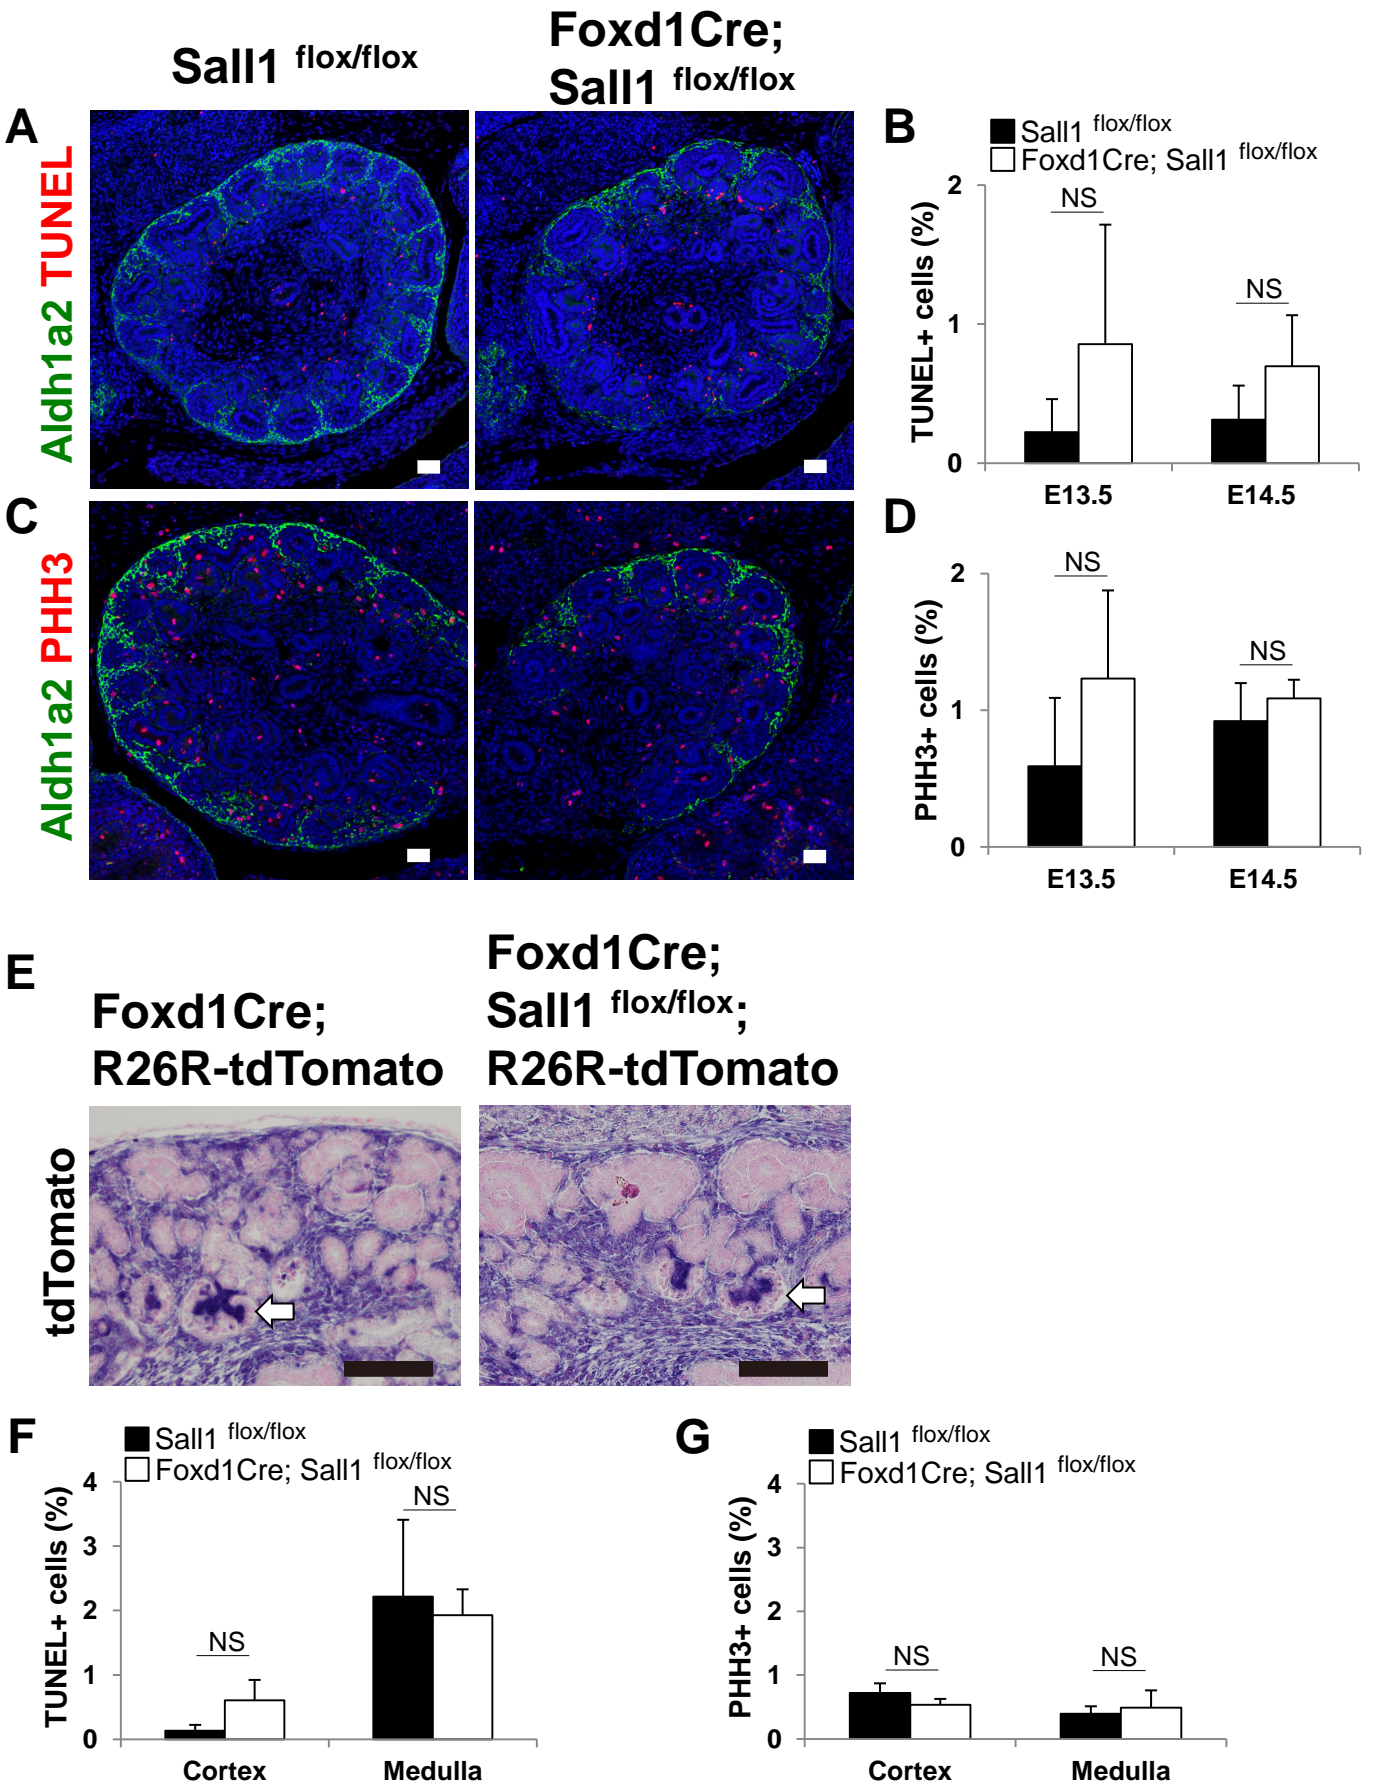

# Supplementary Figure S3

**Sall1** flox/flox

**Foxd1Cre; Sall1** flox/flox

**A**

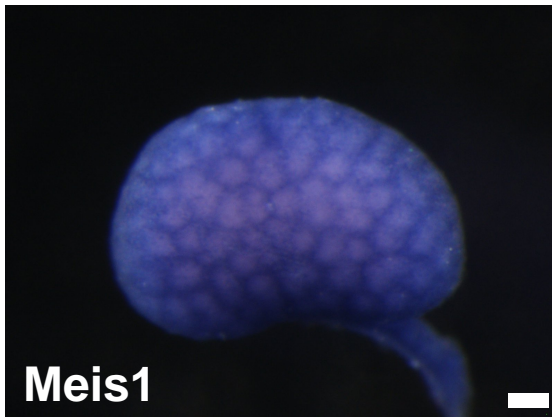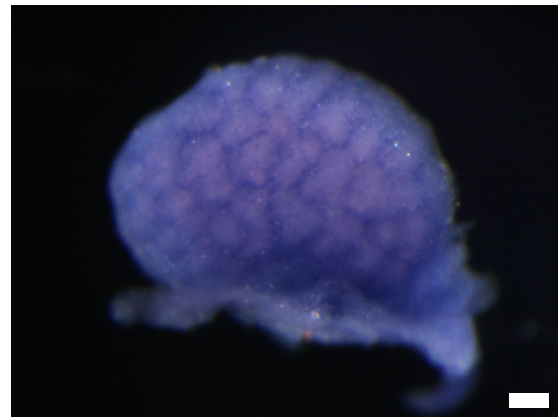

**B**

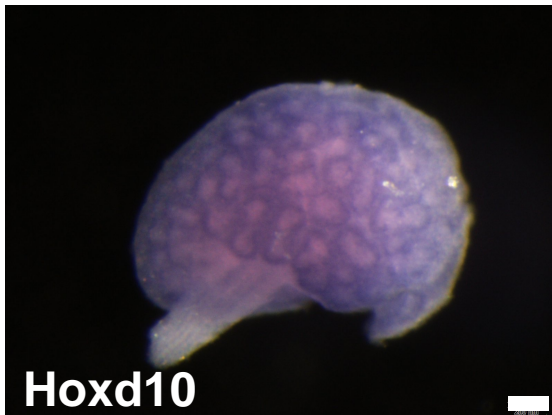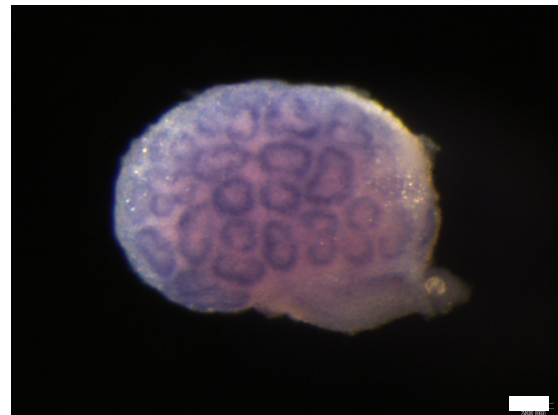

**C**

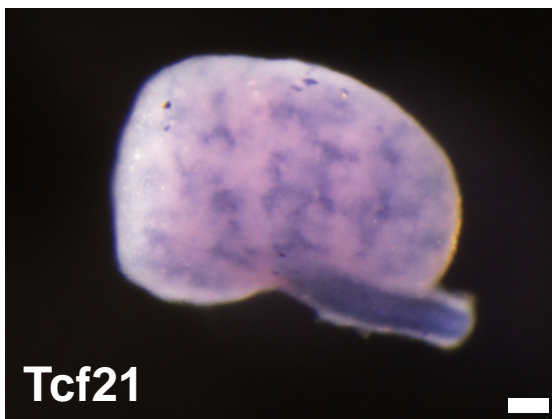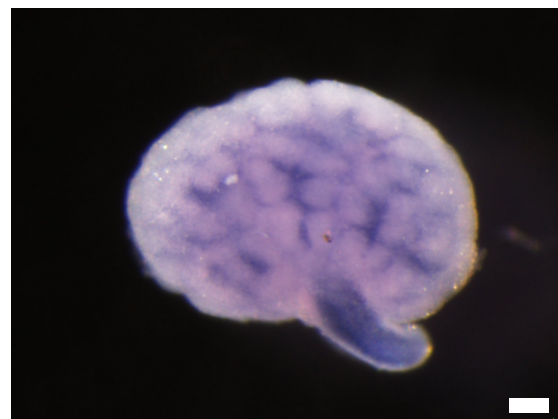

Supplement: srep15676-s1.pdf [file srep15676-s1.pdf]
